# Supplementary material
Source: MDPI journal article supplement (https://www.mdpi.com/2072-4292/10/7/982)
Supplement: s1 [file s1]

## Evaluation of the first year of operational Sentinel-2A data for retrieval of suspended solids in medium- to high-turbidity waters

### **Supplementary Material**

Isabel Caballero, François Steinmetz and Gabriel Navarro

We present here the signal separation between atmosphere and water of all the Sentinel-2A images corrected with POLYMER Atmospheric Correction model (Figure S1-S6). The images show the maps of water reflectance ( $\rho_w$ ) and atmospheric reflectance ( $\rho_{atm}$ ) of the red (665 nm) and NIR (865 nm) bands used for the calibration of the multi-conditional model for Total Suspended Solids retrieval. The atmospheric reflectance corresponds to the atmospheric component and sun glint, not including the water component and the Rayleigh scattering. These figures are not properly land masked and some inland pixels are clearly not water. Note the different color scales for each day.

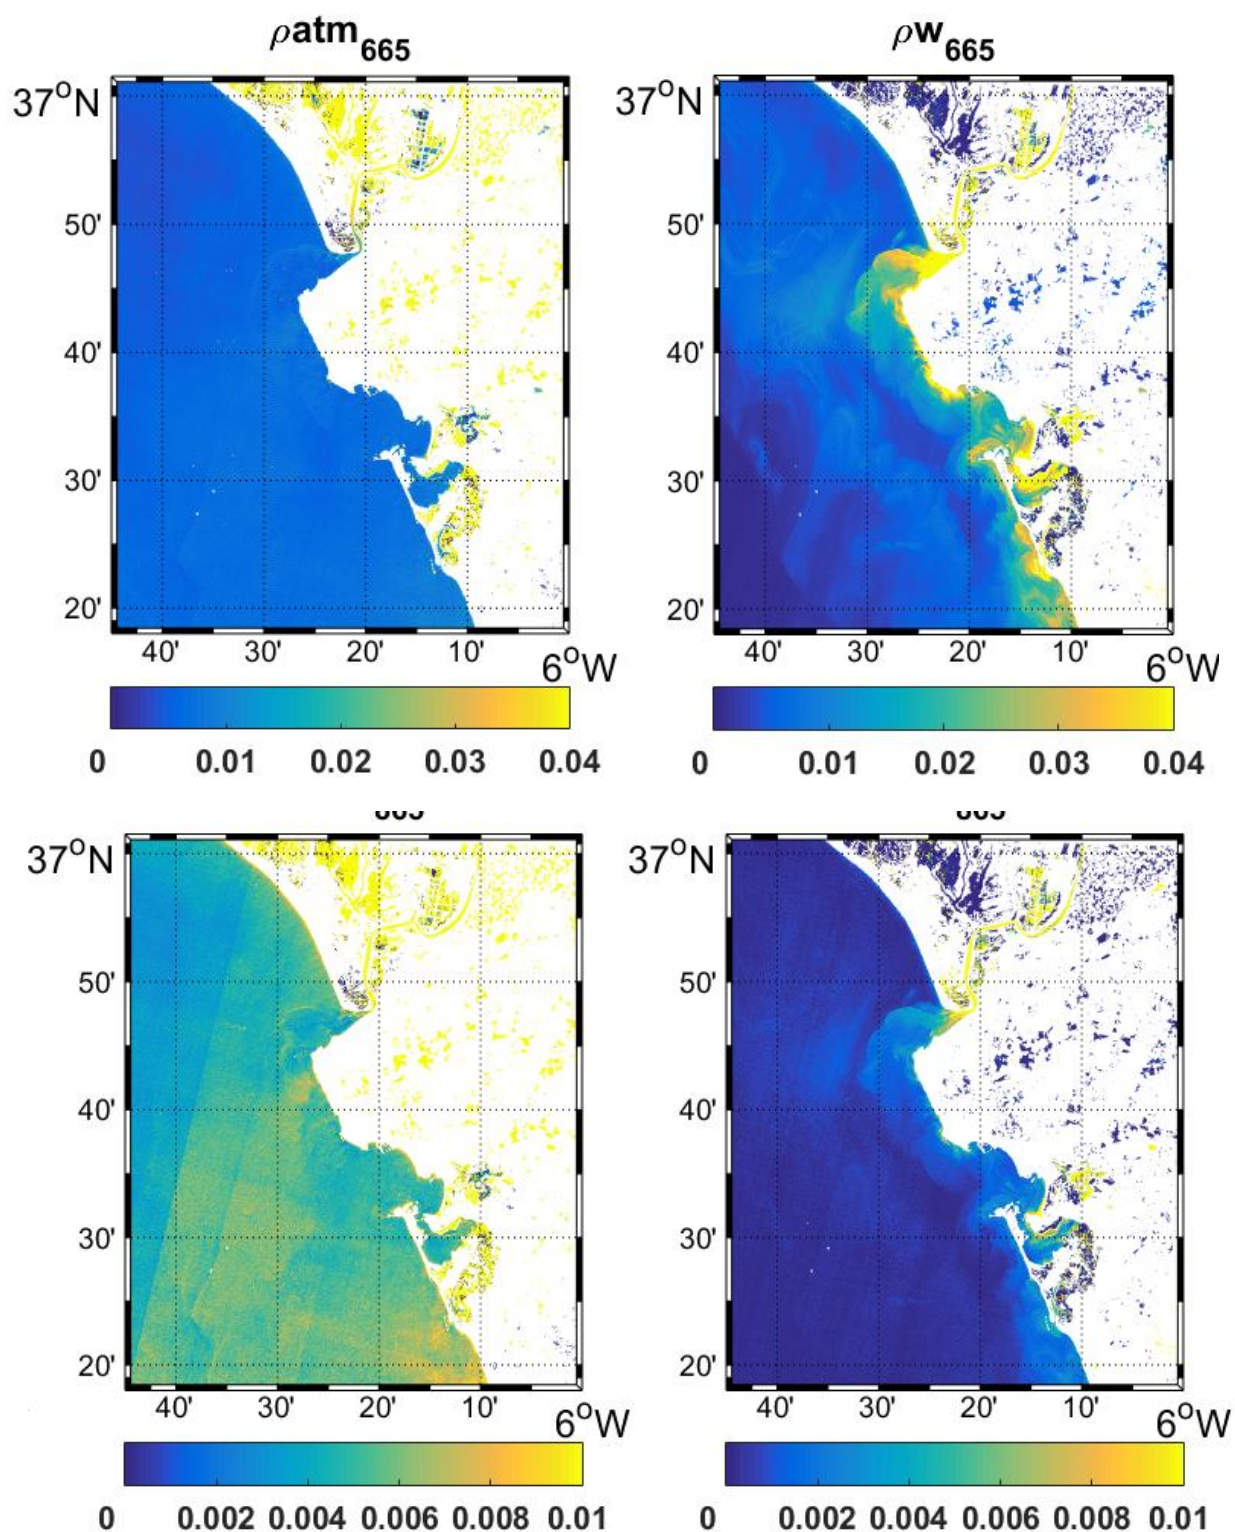

Figure S1. Maps of signal separation of atmosphere (patm) and water (pw) for red (665 nm) and NIR (865 nm) bands, respectively. Sentinel-2A image of 8 March 2016 with POLYMER AC model (60 m).

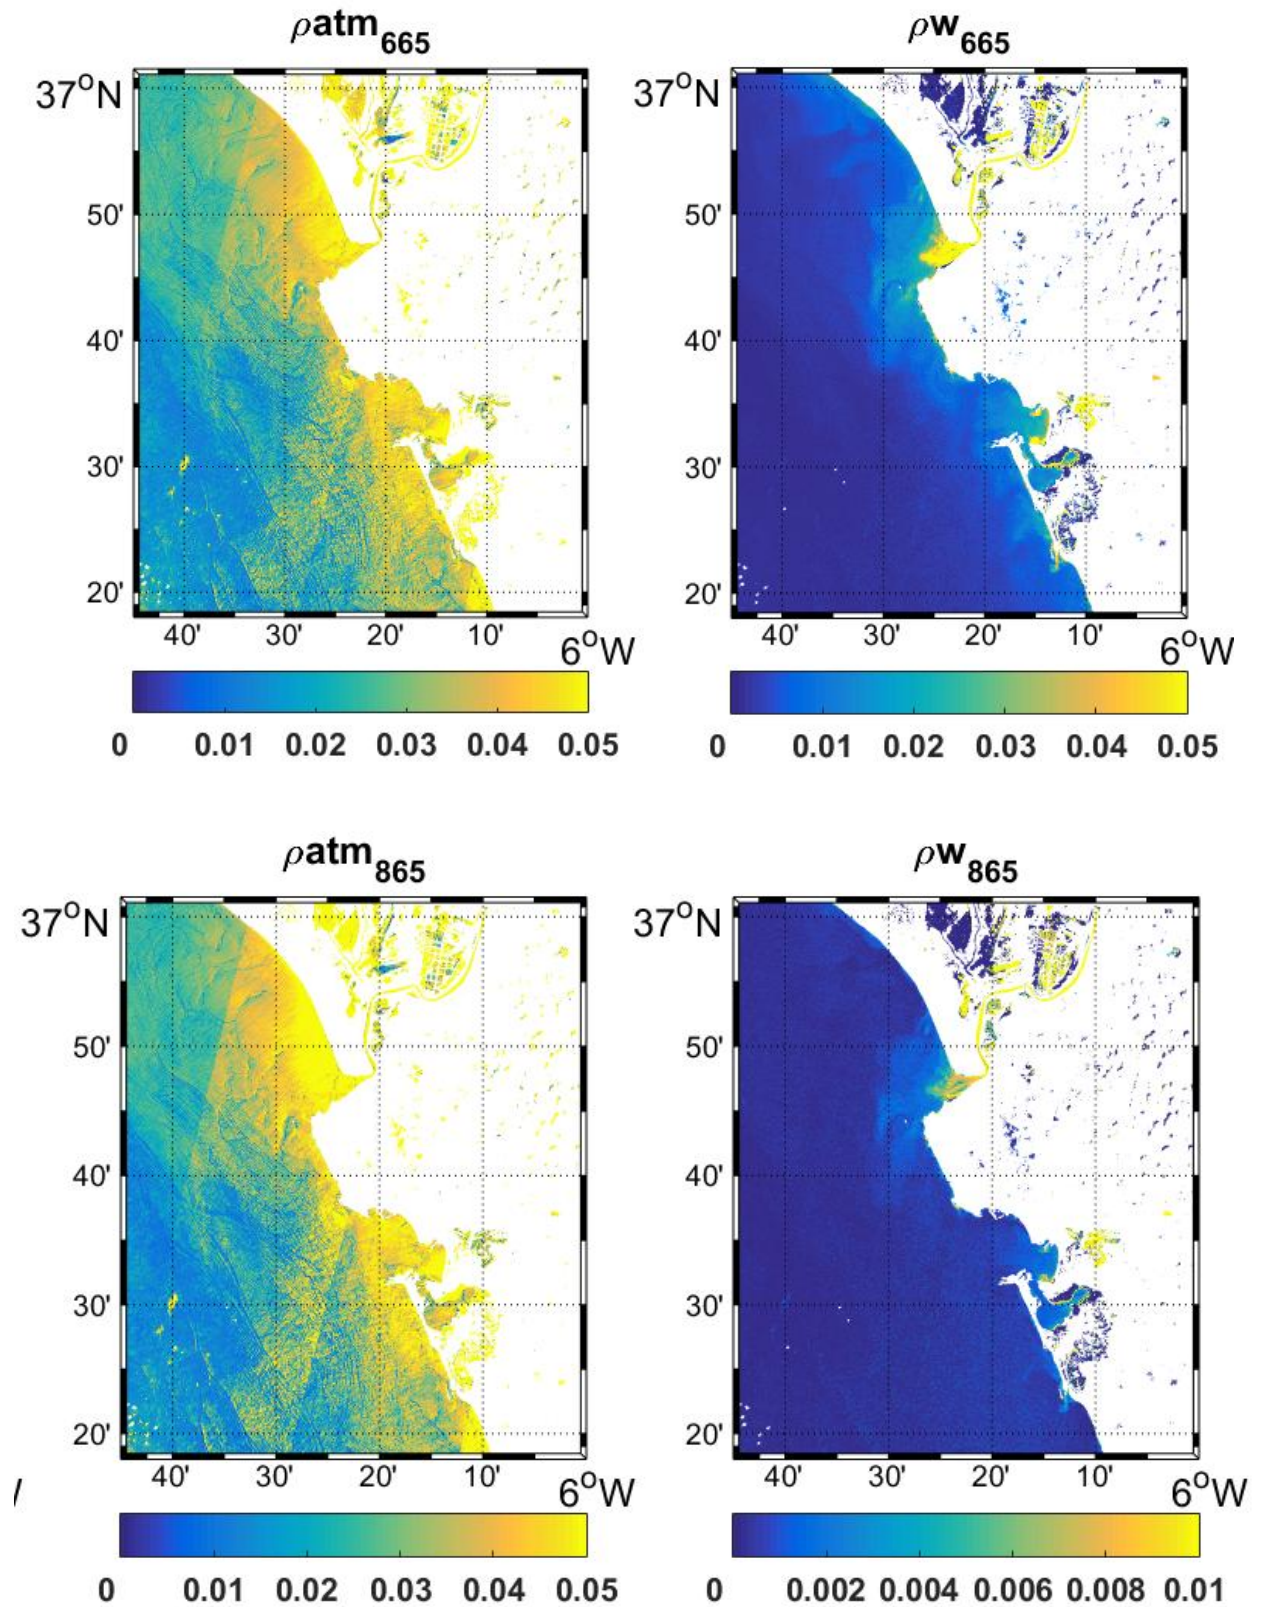

Figure S2. Maps of signal separation of atmosphere (patm) and water (pw) for red (665 nm) and NIR (865 nm) bands, respectively. Sentinel-2A image of 27 May 2016 with POLYMER AC model (60 m). In situ sampling was carried out during this day.



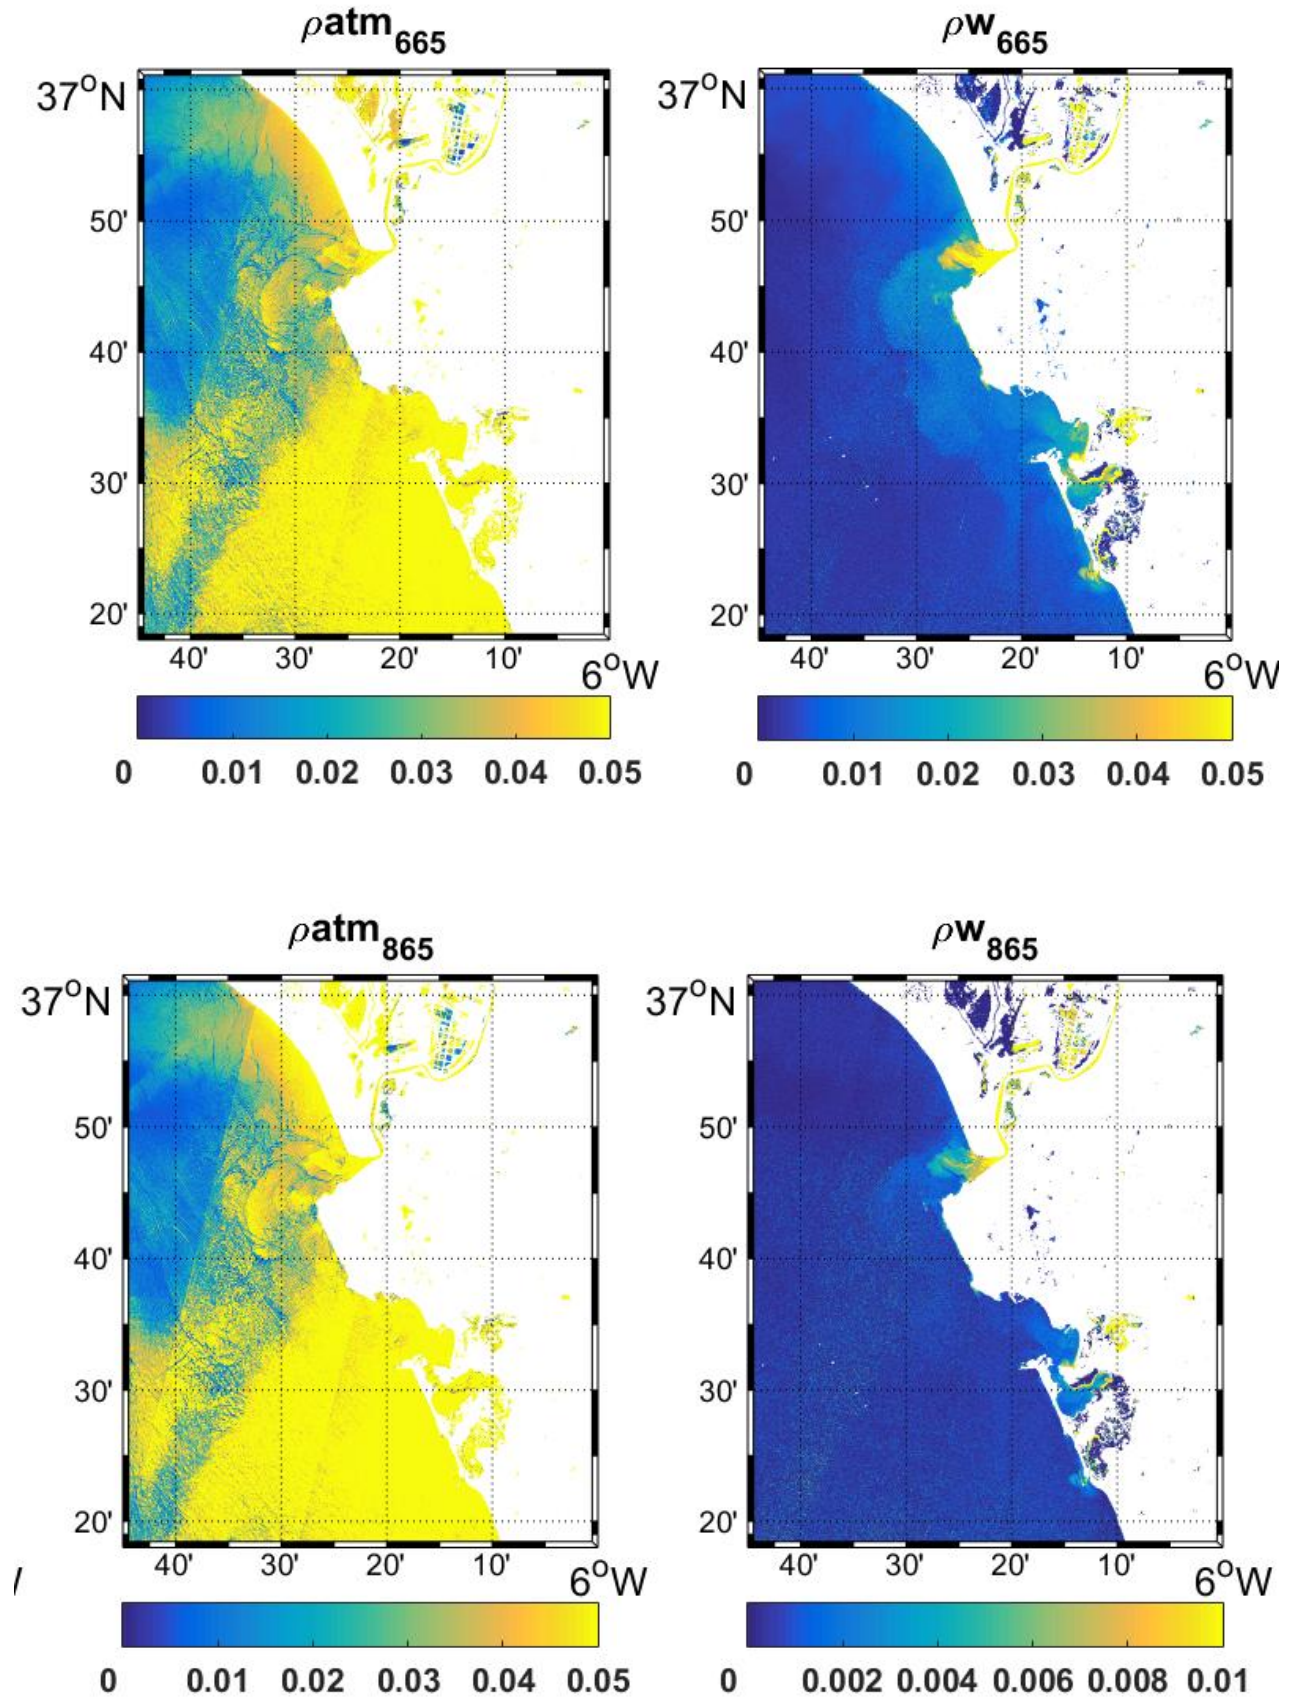

Figure S3. Maps of signal separation of atmosphere ( $\rho_{\text{atm}}$ ) and water ( $\rho_{\text{w}}$ ) for red (665 nm) and NIR (865 nm) bands, respectively. Sentinel-2A image of 6 June 2016 with POLYMER AC model (60 m). In situ sampling was carried out during this day.

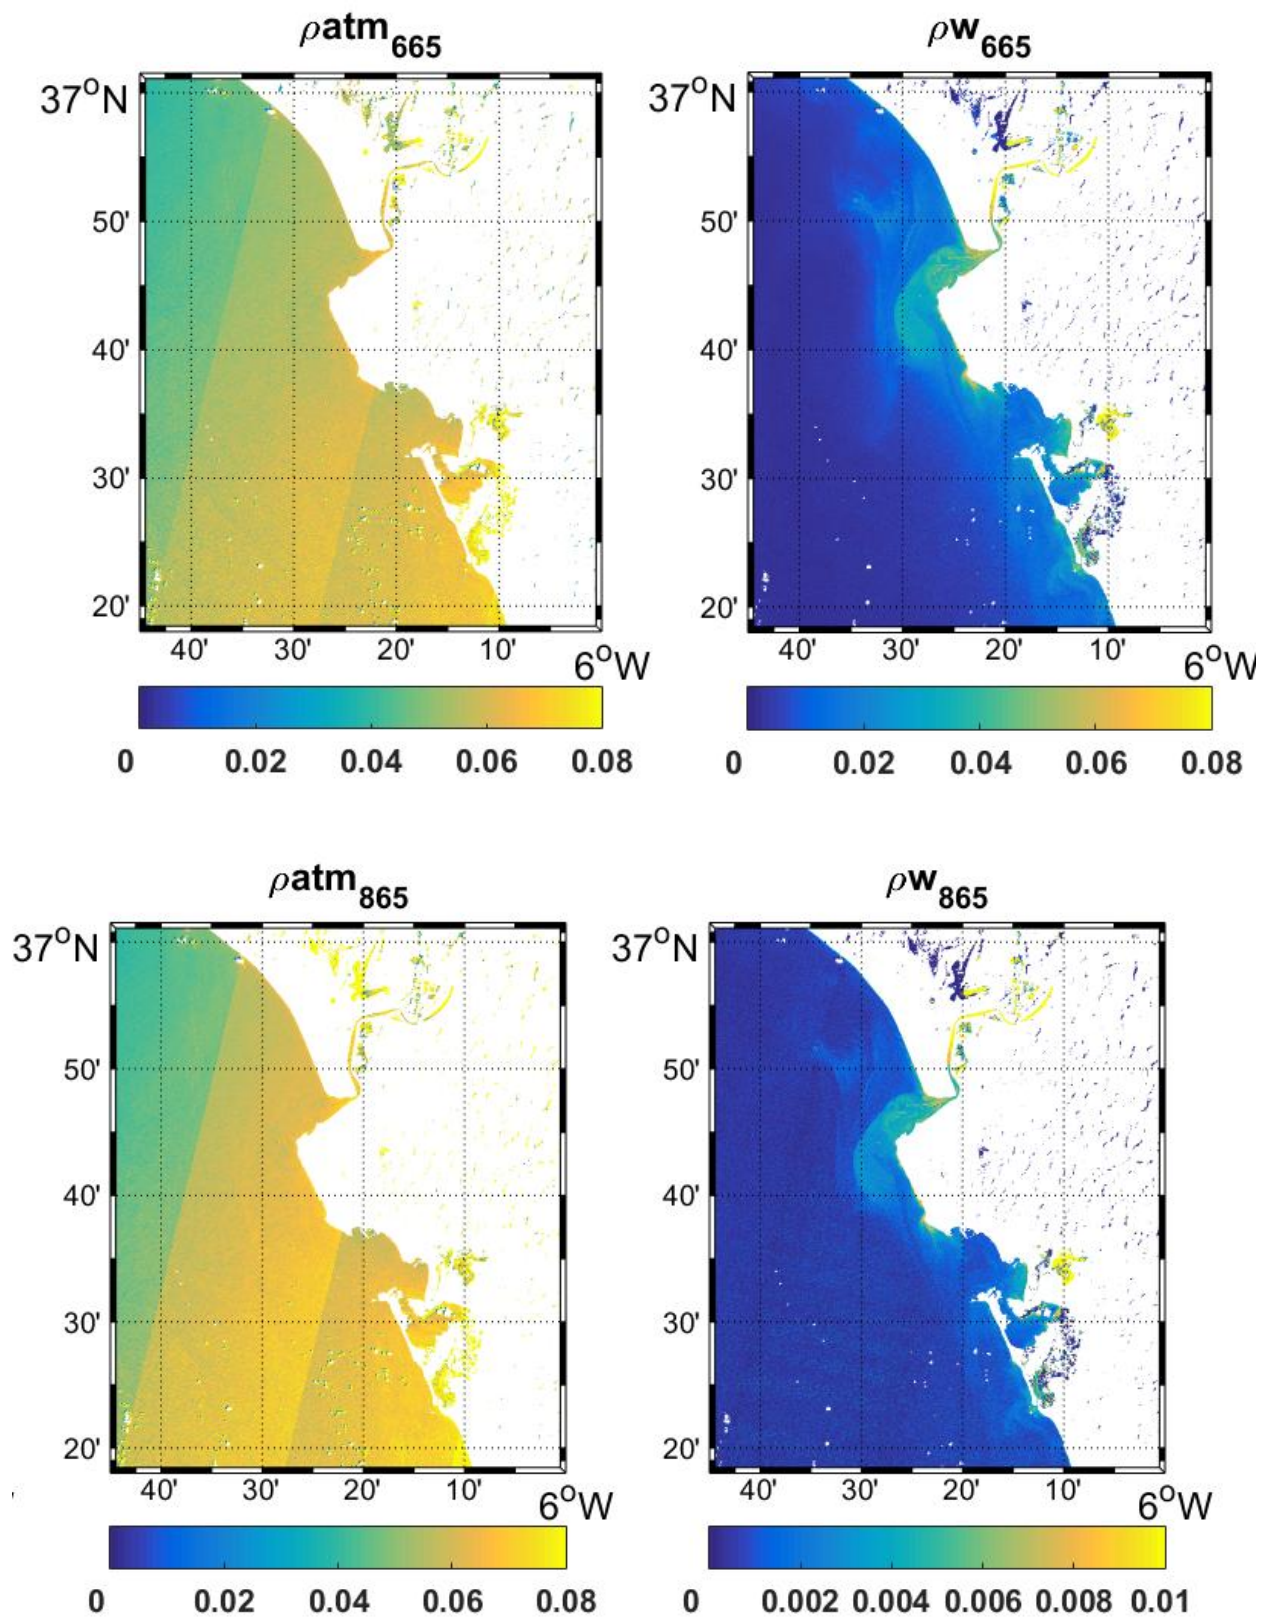

Figure S4. Maps of signal separation of atmosphere (patm) and water (pw) for red (665 nm) and NIR (865 nm) bands, respectively. Sentinel-2A image of 16 June 2016 with POLYMER AC model (60 m). In situ sampling was carried out during this day.



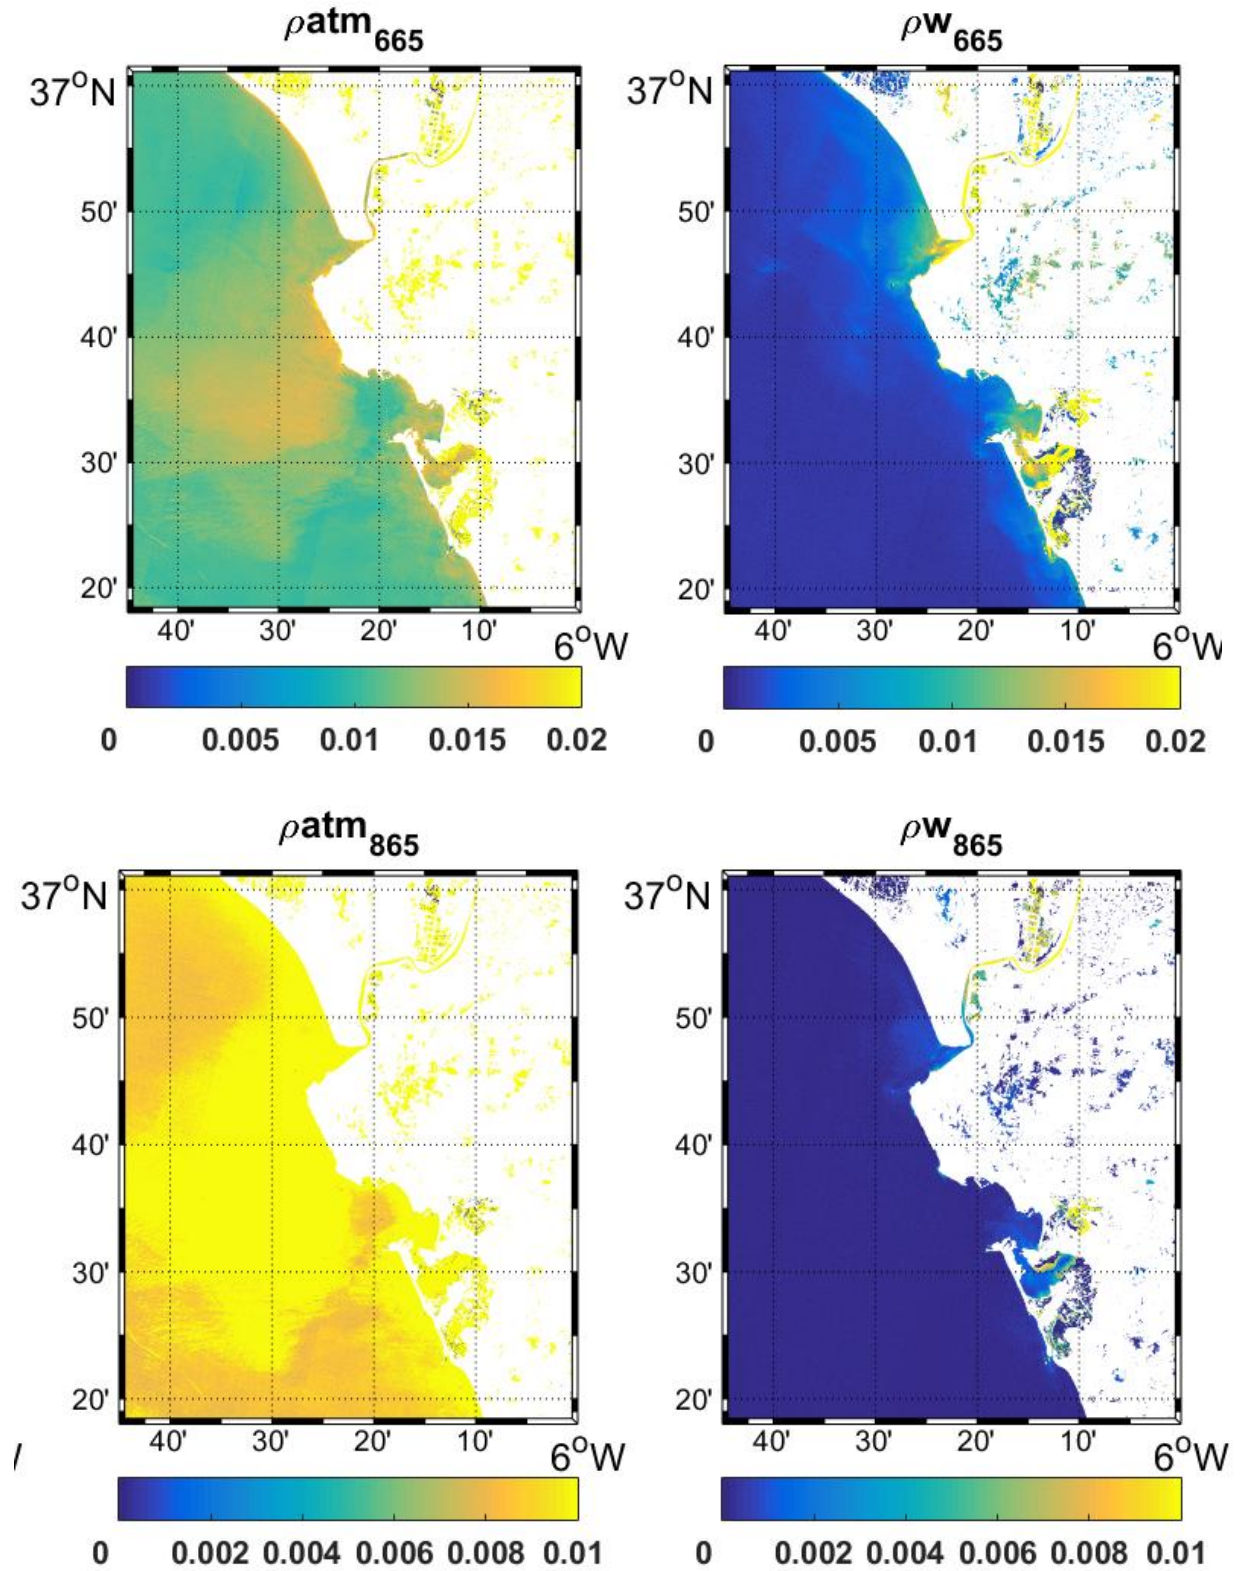

Figure S5. Maps of signal separation of atmosphere ( $\rho_{atm}$ ) and water ( $\rho_w$ ) for red (665 nm) and NIR (865 nm) bands, respectively. Sentinel-2A image of 24 September 2016 with POLYMER AC model (60 m).

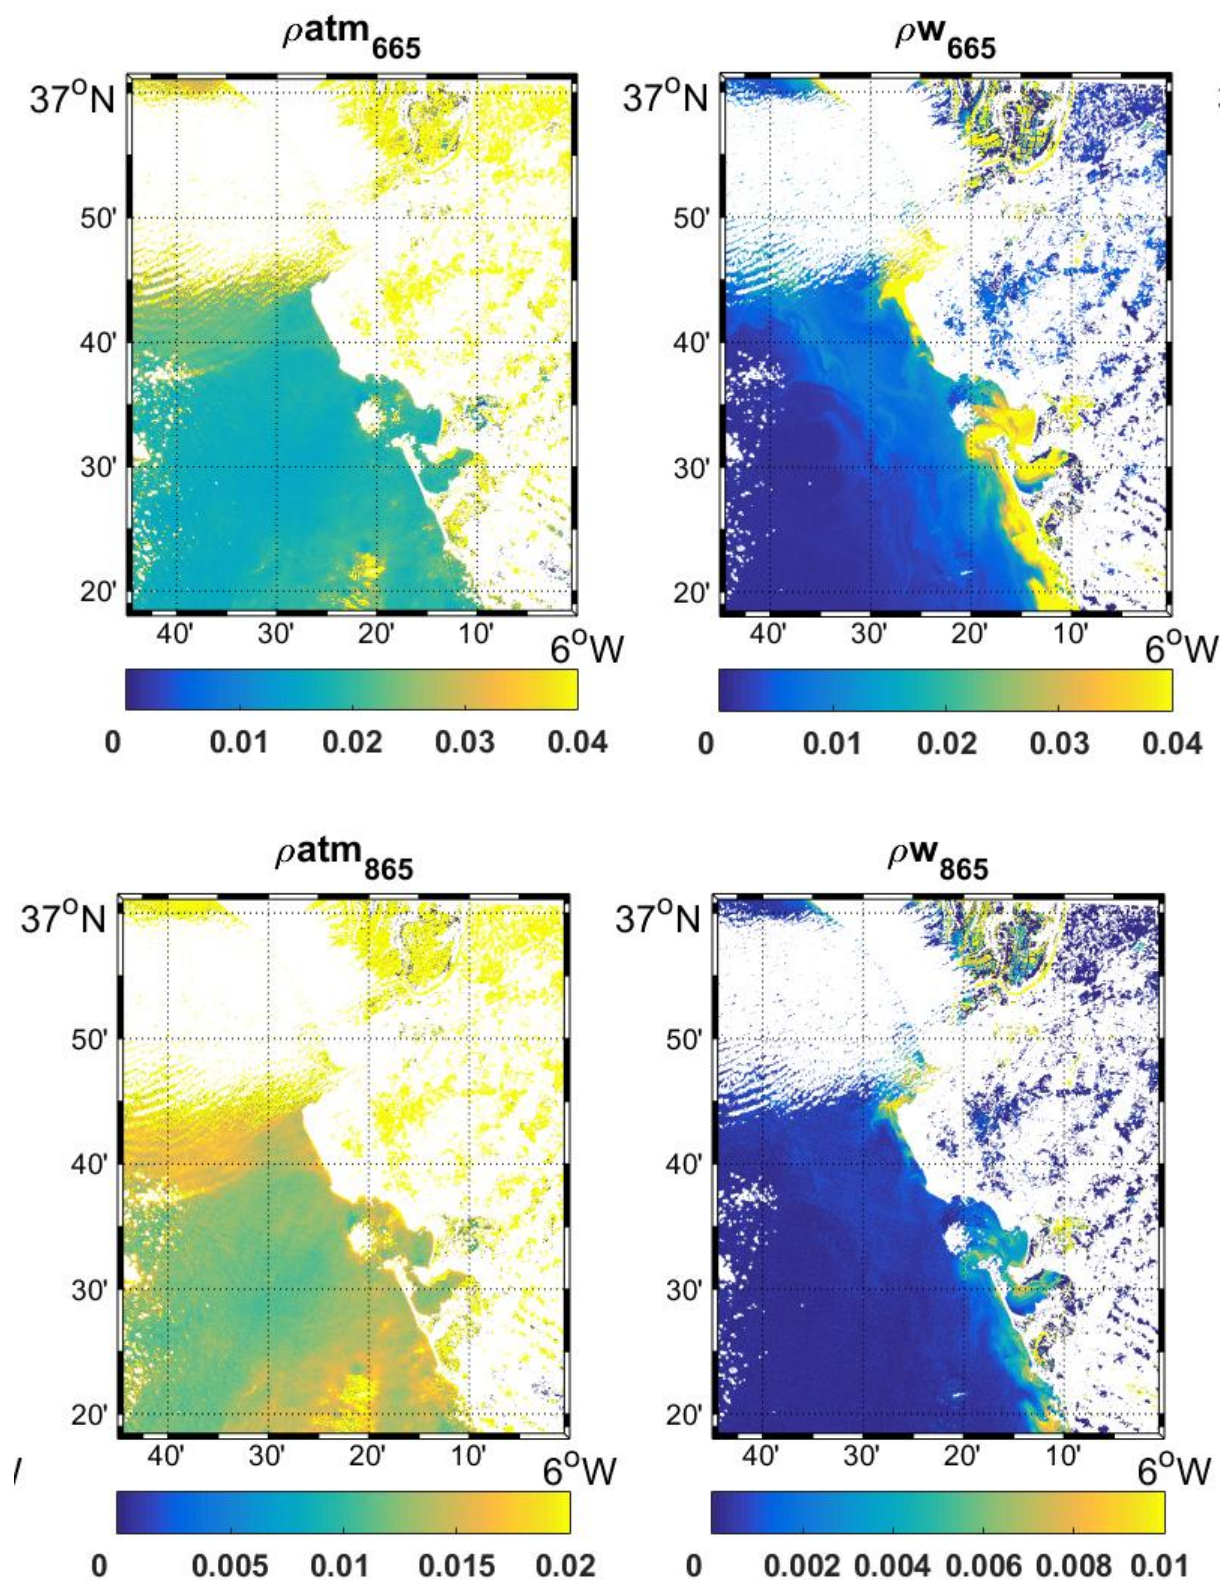

Figure S6. Maps of signal separation of atmosphere ( $\rho_{\text{atm}}$ ) and water ( $\rho_{\text{w}}$ ) for red (665 nm) and NIR (865 nm) bands, respectively. Sentinel-2A image of 13 December 2016 with POLYMER AC model (60 m). In situ sampling was carried out during this day.

Table S1. Performance indicators of the comparison between atmospherically corrected spectra at different wavelengths by POLYMER and ACOLITE procedures in the Guadalquivir estuary and Cadiz Bay Region of Interest (ROI) on 8 March and 24 September 2016. Pearson coefficient of correlation (r), Root Mean Square Error (RMSE) and bias displayed. Parameters a and b correspond to the values of the linear fit both intercept and slope, respectively.

| Statistic                | r      | b      | a       | RMSE   | Bias      | N-values |
|--------------------------|--------|--------|---------|--------|-----------|----------|
| B1 (444 nm) Guadalquivir | 0.9181 | 1.052  | 0.0044  | 0.0070 | 0.0057    | 186048   |
| B1(444 nm) Cadiz         | 0.9723 | 1.2001 | 0.0027  | 0.0086 | 0.0079    | 23700    |
| B2 (497 nm)Guadalquivir  | 0.9853 | 1.081  | -0.0061 | 0.0047 | -0.0035   | 186029   |
| B2 (497 nm) Cadiz        | 0.9935 | 1.1078 | -0.0055 | 0.0032 | -0.0017   | 23650    |
| B3 (560 nm) Guadalquivir | 0.9946 | 1.024  | -0.0023 | 0.0027 | -0.0015   | 186050   |
| B3 (560 nm) Cadiz        | 0.9971 | 1.0352 | -0.0015 | 0.0018 | -0.000085 | 23620    |
| B4 (664 nm) Guadalquivir | 0.9866 | 1.033  | 0.0001  | 0.0016 | 0.00047   | 186050   |
| B4 (664 nm) Cadiz        | 0.9844 | 1.0342 | 0.0010  | 0.0018 | 0.0013    | 23500    |
| B5(704 nm) Guadalquivir  | 0.9659 | 1.003  | 0.0004  | 0.0016 | 0.00050   | 186022   |
| B5 (704 nm) Cadiz        | 0.9652 | 0.9583 | 0.0014  | 0.0015 | 0.0012    | 23550    |
| B6(740 nm) Guadalquivir  | 0.7076 | 0.875  | 0.0008  | 0.0015 | 0.00068   | 186018   |
| B6 (740 nm) Cadiz        | 0.6640 | 0.7206 | 0.0016  | 0.0016 | 0.0013    | 23532    |
| B7 (783 nm) Guadalquivir | 0.7738 | 0.984  | 0.0008  | 0.0016 | 0.00086   | 186066   |
| B7 (783 nm) Cadiz        | 0.7184 | 0.7827 | 0.0018  | 0.0015 | 0.0014    | 23563    |
| B8a(865 nm) Guadalquivir | 0.5990 | 0.823  | 0.001   | 0.0016 | 0.0010    | 185022   |
| B8a (865 nm) Cadiz       | 0.4538 | 0.4511 | 0.0018  | 0.0016 | 0.0014    | 23562    |

Table S2. Performance indicators of the comparison between atmospherically corrected spectra at different wavelengths by POLYMER and ACOLITE strategies in the Guadalquivir estuary and Cadiz Bay Region of Interest (ROI) on 13 December 2016 (coincident with in-situ sampling). Pearson coefficient of correlation (r), Root Mean Square Error (RMSE) and bias displayed. Parameters a and b correspond to the values of the linear fit both intercept and slope, respectively.

| Statistic                | r    | b      | a      | RMSE   | Bias   | N-values |
|--------------------------|------|--------|--------|--------|--------|----------|
| B1 (444 nm) Guadalquivir | 0.71 | 1.1139 | 0.0202 | 0.0206 | 0.0291 | 48902    |
| B1(444 nm) Cadiz         | 0.77 | 1.0331 | 0.0229 | 0.0215 | 0.0235 | 16498    |
| B2 (497 nm) Guadalquivir | 0.93 | 0.9859 | 0.0125 | 0.0151 | 0.0172 | 48716    |
| B2 (497 nm) Cadiz        | 0.95 | 1.1002 | 0.0121 | 0.0168 | 0.0173 | 16648    |
| B3 (560 nm) Guadalquivir | 0.94 | 0.9335 | 0.0088 | 0.0066 | 0.0071 | 48246    |
| B3 (560 nm) Cadiz        | 0.92 | 0.9789 | 0.0061 | 0.0051 | 0.0047 | 16590    |
| B4 (664 nm) Guadalquivir | 0.98 | 0.9811 | 0.0062 | 0.0071 | 0.0062 | 48825    |
| B4 (664 nm) Cadiz        | 0.97 | 0.9857 | 0.0058 | 0.0054 | 0.0048 | 16581    |
| B5(704 nm) Guadalquivir  | 0.97 | 0.9689 | 0.0059 | 0.0062 | 0.0053 | 48911    |
| B5 (704 nm) Cadiz        | 0.94 | 0.9457 | 0.0062 | 0.0062 | 0.0061 | 16469    |
| B6(740 nm) Guadalquivir  | 0.71 | 0.7987 | 0.0065 | 0.0056 | 0.0054 | 48919    |
| B6 (740 nm) Cadiz        | 0.69 | 0.7792 | 0.0058 | 0.0058 | 0.0055 | 16444    |
| B7 (783 nm) Guadalquivir | 0.79 | 0.7854 | 0.0051 | 0.0059 | 0.0054 | 48918    |
| B7 (783 nm) Cadiz        | 0.68 | 0.7544 | 0.0056 | 0.0051 | 0.0049 | 16620    |
| B8a(865 nm) Guadalquivir | 0.77 | 0.7959 | 0.0040 | 0.0041 | 0.0038 | 48120    |
| B8a (865 nm) Cadiz       | 0.69 | 0.7766 | 0.0032 | 0.0039 | 0.0031 | 16236    |



Table S3. Date and timing (UTC) of Sentinel-2A data acquisition, mean discharge (three previous days) from Alcalá del Río dam ( $\text{m}^3/\text{s}$ ), mean precipitation (three previous days) at Sanlúcar de Barrameda (mm), tidal amplitude, and timing of low and high tides at the Bonanza tidal Gauge in Sanlúcar de Barrameda.

| Number | Date/<br>Timing (UTC)         | Discharge<br>( $\text{m}^3/\text{s}$ ) | Hydraulic regime  | Precipitation<br>(mm) | Tidal<br>range<br>(m) | Timing (UTC)<br>High Tide/Low Tide |
|--------|-------------------------------|----------------------------------------|-------------------|-----------------------|-----------------------|------------------------------------|
| 15     | 24 September<br>2016<br>11:12 | 18                                     | Tidally-dominated | 0                     | 1.56                  | 06:36/13:10                        |
| 16     | 4 October<br>2016<br>11:09    | 23.6                                   | Tidally-dominated | 0                     | 2.35                  | 14:01/07:41                        |
| 17     | 14 October<br>2016<br>11:17   | 19.7                                   | Tidally-dominated | 9.5                   | 2.94                  | 10:43/16:52                        |
| 18     | 23 November<br>2016<br>11:23  | 108.5                                  | Intermediate      | 2.7                   | 1.59                  | 09:00/15:24                        |
| 20     | 23 December<br>2016<br>11:16  | 28.33                                  | Tidally-dominated | 0                     | 1.39                  | 09:12/15:25                        |
| 21     | 2 January 2017<br>11:14       | 18.2                                   | Tidally-dominated | 0                     | 2.2                   | 14:30/08:43                        |
| 22     | 12 January<br>2017<br>11:20   | 13.3                                   | Tidally-dominated | 0                     | 2.9                   | 04:44/11:21                        |
| 23     | 1 February<br>2017<br>11:18   | 18.6                                   | Tidally-dominated | 0.46                  | 2.4                   | 05:09/11:43                        |

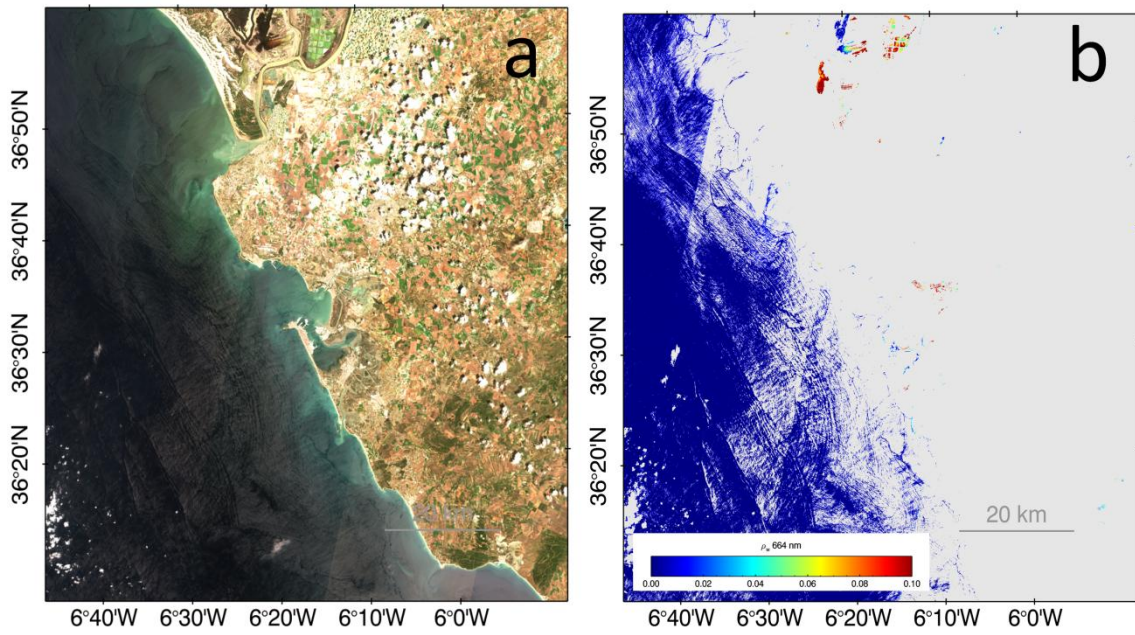

Figure S7. Sentinel-2 image on 27 May 2016 after ACOLITE correction showing moderate sunglint issues on the: (a) true-colour Red-Green-Blue (RGB) composite (B4-B3-B2), (b) water reflectance ( $\rho_w$ ) at 664 nm (B4). Standard ACOLITE flags were used with masked pixels for sunglint.
